# Supplementary material for: Coordination of peptidoglycan synthesis and outer membrane constriction during Escherichia coli cell division
Source: eLife journal article supplement (doi:10.7554/elife.07118), 2015-05-07
Supplement: supp [file elife-07118-supp-v1.zip]

**Figure 4–figure supplement 3. Timing of localization to mid-cell for CpoB-mCherry, GFP-TolA, and PBP1B, with comparison to divisome proteins FtsZ, PBP3, and FtsN.**

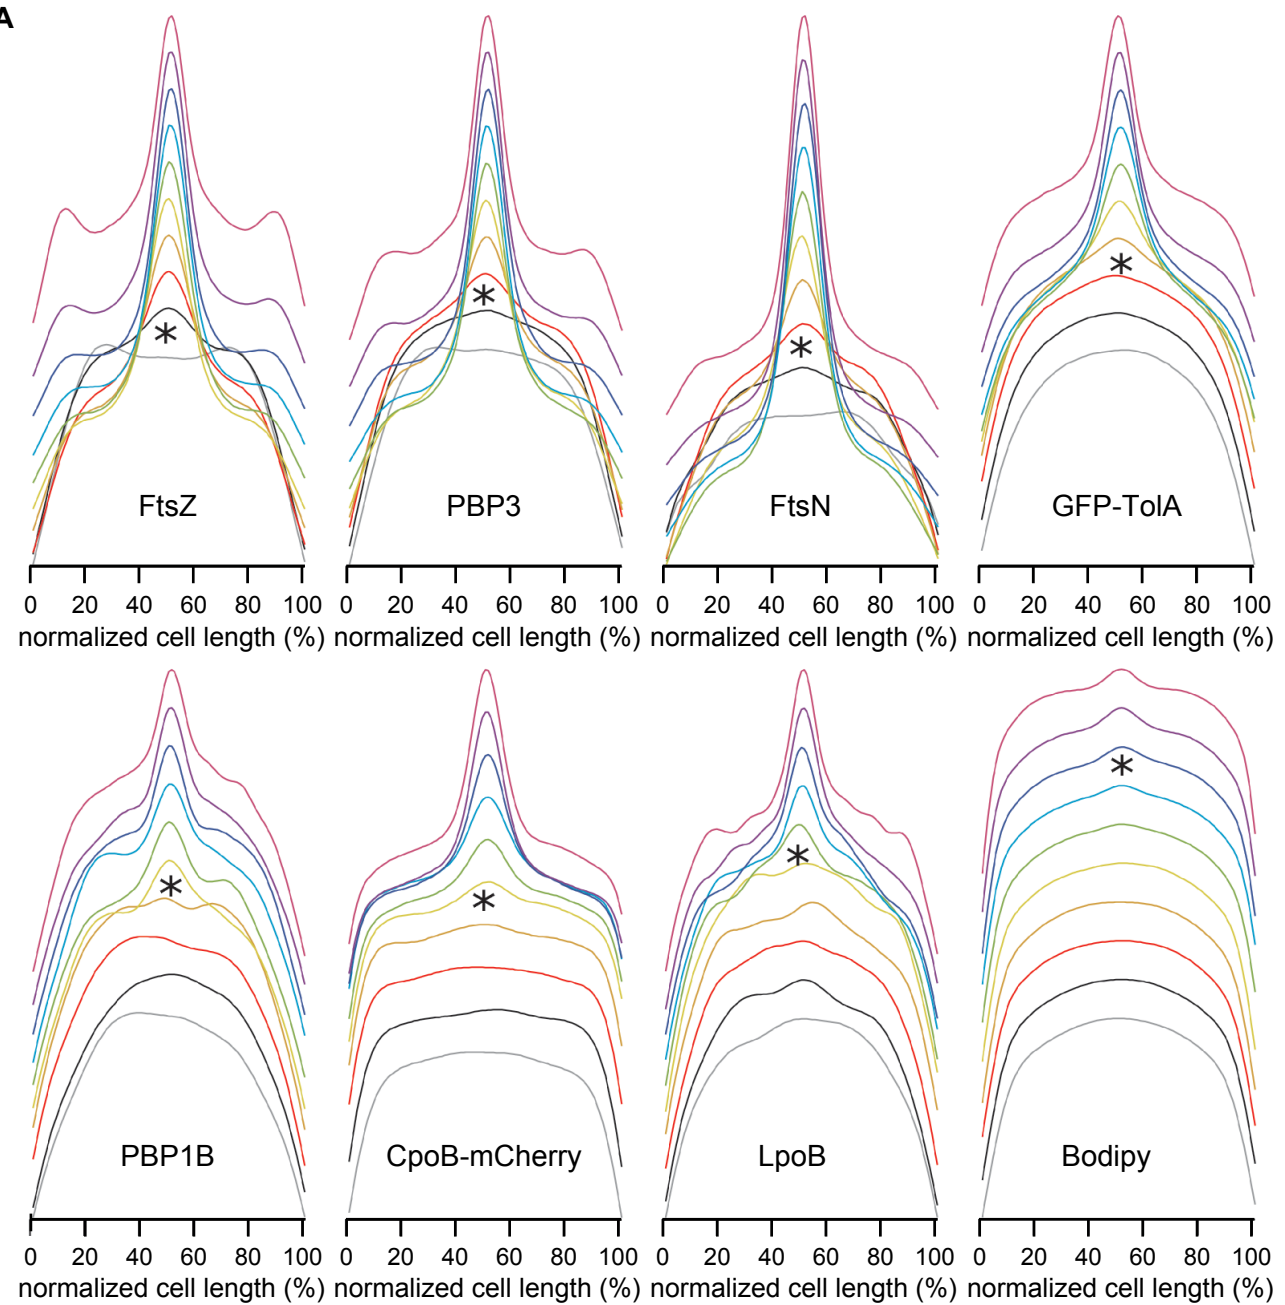

**B**

| Immunolabeled protein | Ring Fraction (%) <sup>1</sup> | Age class initiation (%) <sup>2</sup> | Moment (%) <sup>3</sup> |           |
|-----------------------|--------------------------------|---------------------------------------|-------------------------|-----------|
| FtsZ <sup>4</sup>     | 31.4 ± 1.4                     | 10-20                                 | 72.5                    | — 0-10%   |
| PBP3 <sup>4</sup>     | 33.0 ± 2.1                     | 20-30                                 | 67.5                    | — 10-20%  |
| FtsN <sup>4</sup>     | 42.0 ± 2.2                     | 20-30                                 | 87.5                    | — 20-30%  |
| PBP1B                 | 11.7 ± 1.8                     | 40-50                                 | 87.5                    | — 30-40%  |
| LpoB                  | 11.4 ± 1.6                     | 50-60                                 | 92.5                    | — 40-50%  |
| CpoB                  | 32.6 ± 2.4                     | 40-50                                 | 87.5                    | — 50-60%  |
| CpoB-mCherry*         | 13.3 ± 1.0                     | 40-50                                 | 97.5                    | — 60-70%  |
| GFP-TolA**            | 19.0 ± 0.8                     | 30-40                                 | 87.5                    | — 70-80%  |
| Bodipy                | 3.75 ± 0.31                    | 70-80                                 | 97.5                    | — 80-90%  |
|                       |                                |                                       |                         | — 90-100% |

age class key  
(% cell cycle progression)
