# Supplementary material for: Coordination of peptidoglycan synthesis and outer membrane constriction during Escherichia coli cell division
Source: eLife journal article supplement (doi:10.7554/elife.07118), 2015-05-07

**Figure 4-figure supplement 1. Endogenously-encoded CpoB-mCherry and GFP-TolA fusion proteins are functional.**

**A**

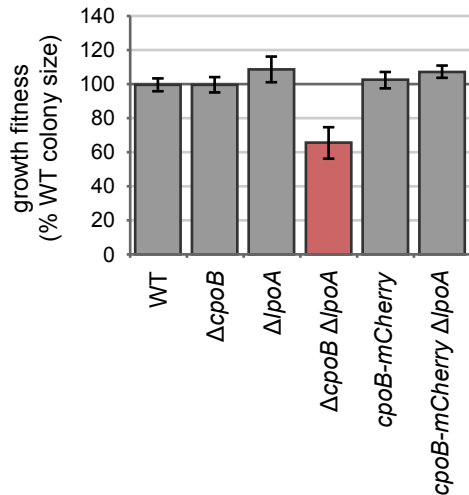

**B**

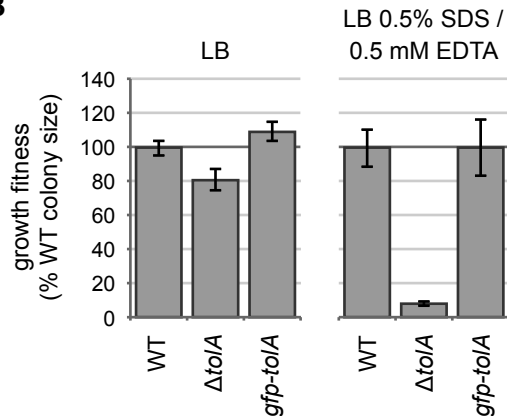

Supplement: supp [file elife-07118-supp-v1.zip]
