# Supplementary material for: Coordination of peptidoglycan synthesis and outer membrane constriction during Escherichia coli cell division
Source: eLife journal article supplement (doi:10.7554/elife.07118), 2015-05-07

**Figure 2—figure supplement 1. Elevated cell lysis in cells lacking PBP1B or CpoB; loss of LpoA exacerbates lysis in the absence of CpoB.**

**A**

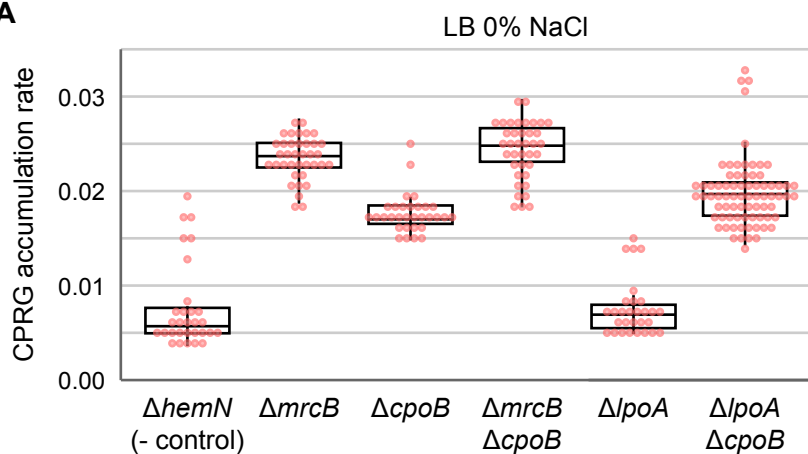

**B**

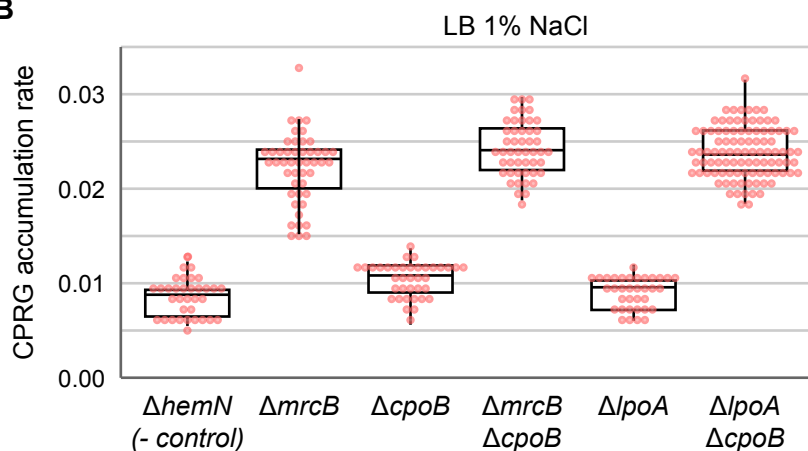

**C**

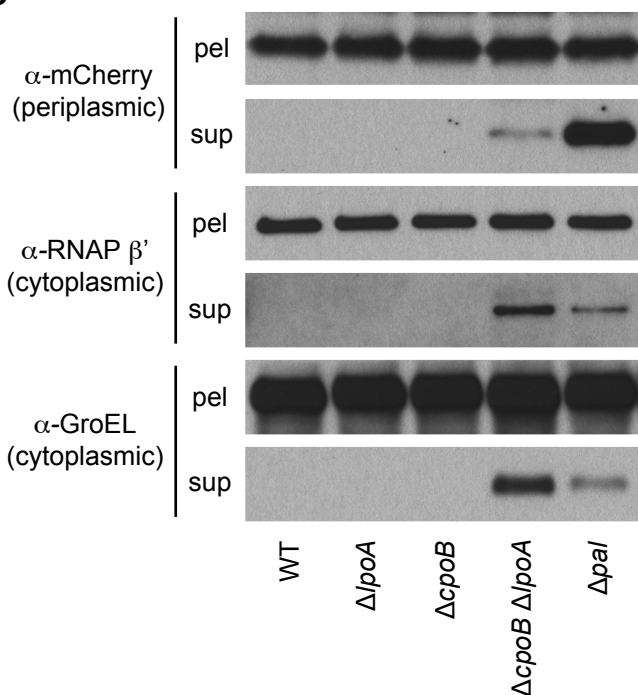

Supplement: supp [file elife-07118-supp-v1.zip]
