# Supplementary material for: Coordination of peptidoglycan synthesis and outer membrane constriction during Escherichia coli cell division
Source: eLife journal article supplement (doi:10.7554/elife.07118), 2015-05-07

**Figure 2—figure supplement 3. LpoA encodes a second function, and the LpoA TPR domain is dispensable for PBP1A activation.**

**A**

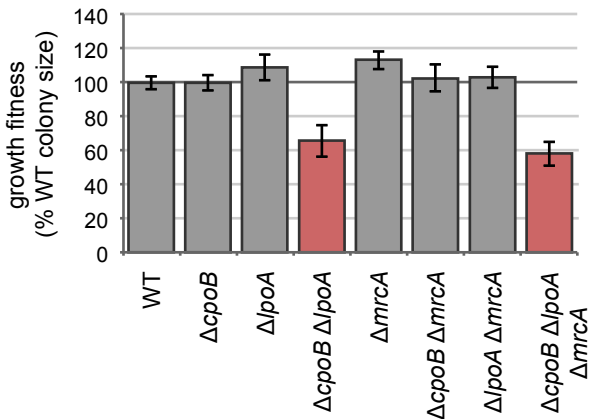

**B**

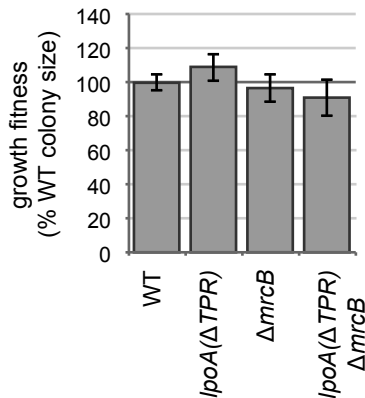

**C**

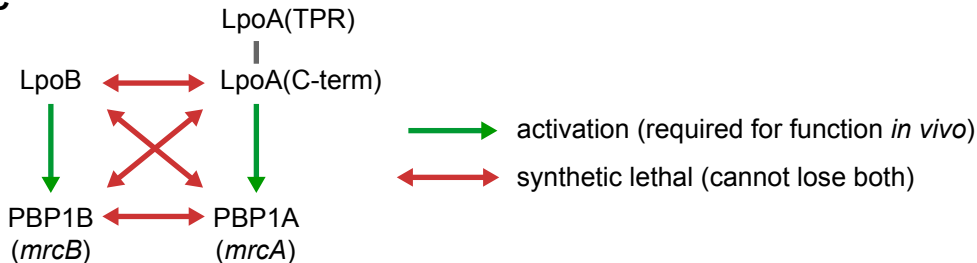

Supplement: supp [file elife-07118-supp-v1.zip]
