# Supplementary material for: Coordination of peptidoglycan synthesis and outer membrane constriction during Escherichia coli cell division
Source: eLife journal article supplement (doi:10.7554/elife.07118), 2015-05-07

**Figure 2–figure supplement 2. Complementation of  $\Delta cpoB$  phenotypes.**

**A**

**cefsulodin sensitivity (12  $\mu$ g/ml)**

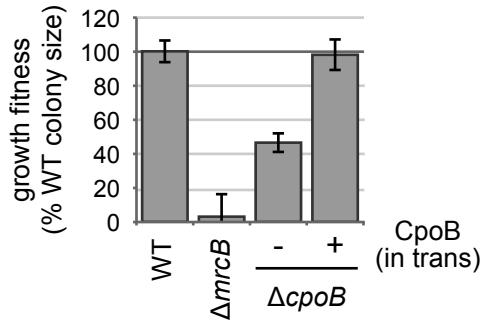

**B**

**growth fitness**

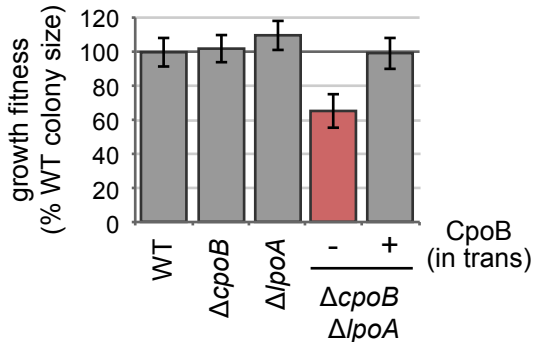

Supplement: supp [file elife-07118-supp-v1.zip]
