# Supplementary material for: Coordination of peptidoglycan synthesis and outer membrane constriction during Escherichia coli cell division
Source: eLife journal article supplement (doi:10.7554/elife.07118), 2015-05-07

**Figure 2—figure supplement 4. The N-terminal TPR domain of LpoA encodes a novel function that compensates for loss of CpoB.**

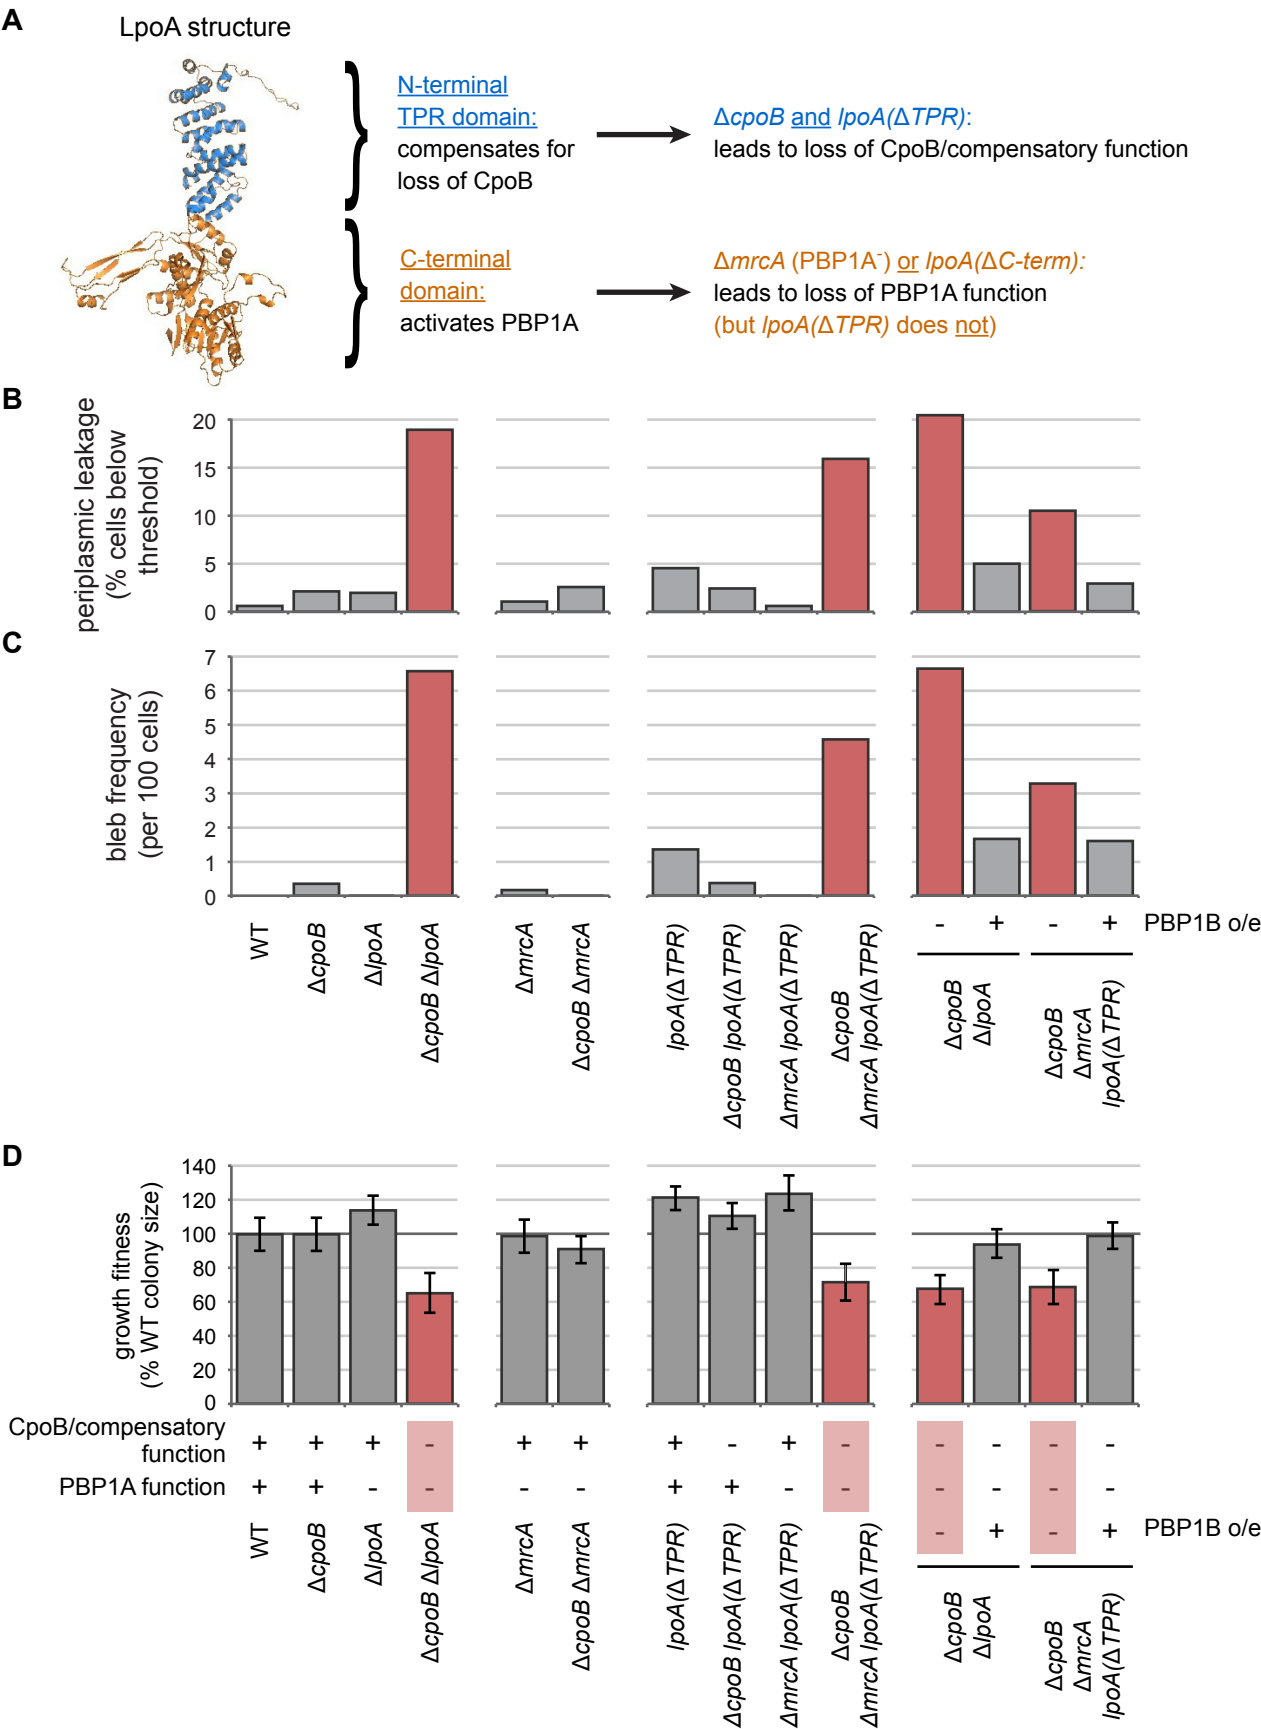

Supplement: supp [file elife-07118-supp-v1.zip]
