# Supplementary material for: Coordination of peptidoglycan synthesis and outer membrane constriction during Escherichia coli cell division
Source: eLife. 2015 May 7;4:e07118. doi: 10.7554/eLife.07118 (PMC4458516; doi:10.7554/eLife.07118)
Supplement: Supplementary File 1. — Bacterial strains and plasmids used in this study. DOI: http://dx.doi.org/10.7554/eLife.07118.024 [file elife07118s001.xlsx]

## Sheet: strains & plasmids
Strain/Plasmid	Genotype/Properties	Notes/Reference
E. coli Strains
BW25113	Wild-type strain and parent strain for Keio single-gene knockout library; genotype F- Δ(araD-araB)567 lacZ4787(del)::rrnB-3 LAM- rph-1 Δ(rhaD-rhaB)568 hsdR514	(Datsenko and Wanner, 2000)
Keio ΔcpoB::kan (ΔybgF::kan)	BW25113 ΔcpoB::kan	(Baba et al., 2006)
Keio ΔmrcB::kan	BW25113 ΔmrcB::kan	(Baba et al., 2006)
Keio ΔlpoB::kan	BW25113 ΔlpoB::kan	(Baba et al., 2006)
CAG70033 (in text, refered to as ΔcpoB)	BW25113 ΔcpoB::kan	This work
CAG70031 (ΔmrcB)	BW25113 ΔmrcB::kan	This work
CAG70027	BW25113 ΔlpoB::kan	This work
CAG70100	BW25113 ΔlpoA::FRT	This work
CAG70257	BW25113 ΔcpoB::kan ΔlpoA::FRT	This work
CAG70102	BW25113 ΔmrcA::FRT	This work
CAG70112	BW25113 ΔcpoB::kan ΔmrcA::FRT	This work
CAG70455	BW25113 ΔlpoA::FRT ΔmrcA::FRT	This work
CAG70529	BW25113 ΔcpoB::kan ΔlpoA::FRT ΔmrcA::FRT	This work
CAG70134	BW25113 lpoA(Δ1-255::(sacB-kan))	This work
CAG70169	BW25113 lpoA(Δ58-252)	This work
CAG70560	BW25113 lpoA(Δ58-252) ΔmrcB::kan	This work
CAG70556	BW25113 ΔcpoB::kan lpoA(Δ58-252)	This work
CAG70566	BW25113 ΔmrcA::FRT lpoA(Δ58-252)	This work
CAG70607	BW25113 ΔcpoB::kan ΔmrcA::FRT lpoA(Δ58-252)	This work
CAG70204	BW25113 ΔtolA::kan	This work
CAG70568	BW25113 ΔtolQ::kan	This work
CAG70620	BW25113 ΔtolR::FRT	This work
CAG70764	BW25113 tolR(D23::(sacB-cat))	This work
CAG70776	BW25113 tolQ(D23R)	This work
CAG70150	BW25113 Δpal::kan	This work
Keio ΔhemN::kan	BW25113 ΔhemN::kan	This work
Keio ΔlpoA::kan	BW25113 ΔlpoA::kan	This work
Keio ΔmrcA::kan	BW25113 ΔmrcA::kan	This work
Keio ΔmrcB::kan ΔcpoB::cat	BW25113 ΔmrcB::kan ΔcpoB::cat	This work
MG1655 attHK::pTU136	MG1655 attHK::(oriR6K bla lacIq Plac-dsbA(1-24)::mCherry); expresses periplasmic mCherry under the control of the IPTG-inducible Plac promoter	Gift of Tom Bernhardt
CAG70159	BW25113 attHK::pTU136	This work
CAG70173	BW25113 attHK::pTU136 ΔcpoB::kan	This work
CAG70170	BW25113 attHK::pTU136 ΔlpoA::FRT	This work
CAG70181	BW25113 attHK::pTU136 ΔcpoB::kan ΔlpoA::FRT	This work
CAG70172	BW25113 attHK::pTU136 ΔmrcA::FRT	This work
CAG70185	BW25113 attHK::pTU136 ΔcpoB::kan ΔmrcA::FRT	This work
CAG70273	BW25113 attHK::pTU136 lpoA(Δ58-252)	This work
CAG70301	BW25113 attHK::pTU136 ΔcpoB::kan lpoA(Δ58-252)	This work
CAG70594	BW25113 attHK::pTU136 ΔmrcA::FRT lpoA(Δ58-252)	This work
CAG70608	BW25113 attHK::pTU136 ΔcpoB::kan ΔmrcA::FRT lpoA(Δ58-252)	This work
CAG70284	BW25113 attHK::pTU136 ΔtolA::kan	This work
LMC500	MC4100; genotype F- araD139 Δ(argF-lac)U169 deoC1 flbB5301 ptsF25 rbsR relA1 rpsL150 lysA1
CAG70285	BW25113 cpoB::(sacB-kan)	This work
CAG70345	BW25113 cpoB::GSGSGSGS::mCherry	This work
CAG70702	LMC500 cpoB::GSGSGSGS::mCherry	This work
CAG70731	BW25113 tolA::(sacB-cat)	This work
CAG70576	BW25113 gfpmut2::ATGTRT::tolA	This work
CAG70698	LMC500 gfpmut2::ATGTRT::tolA	This work
LMC509	MC4100 lysA ftsZ84(ts)	(Taschner et al., 1988)
LMC512	MC4100 lysA ftsA12(ts)	(Taschner et al., 1988)
JLB17	F- thr trp his thy ara lac gal xyl mtl rspL tonA ftsW(ts)	(Ishino et al., 1989)
LMC510	MC4100 lysA ftsI2158(ts)	(Taschner et al., 1988)
JOE565	JOE309 ftsN::kan/pJC83 (pBAD33-FtsN; expresses FtsN from arabinose-inducible promoter)	(Chen and Beckwith, 2001)
BL21(DE3)	Expression strain; F- ompT dcm hsdS (rB- mB-) gal λ(DE3)	Novagen
Plasmids
pIB279	sacB-kan template plasmid	(Blomfield et al., 1991)
pDS132	sacB-cat template plasmid	(Philippe et al., 2004)
pMG36	mCherry template plasmid (encodes pal-mCherry)	(Gerding et al., 2007)
pBAD24-gfp	gfpmut2 template plasmid	(Nilsen et al., 2004)
pBAD33	P15A ori, CmR (cat), araC, ParaBAD promoter (arabinose-inducible)	(Guzman et al., 1995)
pBAD33-PBP1B	Expresses untagged full-length PBP1B (mrcB) from the ParaBAD promoter.	This work
pBAD33-CpoB	Expresses untagged full-length CpoB from the ParaBAD promoter.	This work
pTolA	pBAD33-TolA; expresses untagged full-length TolA from the ParaBAD promoter.	This work
pDML924	pET28a with oligohistidine-tagged PBP1Bγ (residues 46-844 of PBP1B)	(Terrak et al., 1999)
pDML924-T118amber	Amber (TAG) codon substituted at position 118 of PBP1Bγ	This work
pDML924-E123amber	Amber (TAG) codon substituted at position 123	This work
pDML924-T751amber	Amber (TAG) codon substituted at position 751	This work
pDML924-T753amber	Amber (TAG) codon substituted at position 753	This work
pSup-BpaRS-6TRN	Expresses tRNA and aminoacyl tRNA synthetase for pBpa amber codon substitution	(Ryu and Schultz, 2006)
pET28-His6-LpoB	Expresses thrombin-cleavable N-terminally His6-tagged LpoB: MGSSH6SSGLVPRGSHM-LpoB(V21-Q213).	(Typas et al., 2010)
pET28-His6-CpoB	Expresses thrombin-cleavable N-terminally His6-tagged CpoB: MGSSH6SSGLVPRGSHM-CpoB(A26-M263).	This work
pET28-TolA-His6	Expresses C-terminally His6-tagged TolA: TolA-LEH6	This work
pET28-His6-TolA	Expresses thrombin-cleavable N-terminally His6-tagged TolA: MGSSH6SSGLVPRGSHM-TolA	This work
pET28-His6-TolA(sol)	Expresses thrombin-cleavable N-terminally His6-tagged periplasmic region of TolA: MGSSH6SSGLVPRGSHM-TolA(72-421)	This work

## Sheet: primers
Primer	Sequence	Description	Used to make
primers for E. coli strain construction
ANG014	TGCCGATTTAATATTGAGCATTGCGTAAAAAAAATATCACTGGATACATTCCTTTTATGATTTTCTATCAAACAAAAGAGG	[50 bp upstream lpoA]-[pIB279 sacB-kan cassette fwd]	lpoA(Δ1-255::(sacB-kan))
ANG015	AATACCGCTGCCTGGCCATTCAGTGGCAACAGCAGGGCGATTTTGTTGGTGCTTGGTCGGTCATTTCGAACC	[reverse complement of lpoA nt 766-815]-[pIB279 sacB-kan cassette rev]	lpoA(Δ1-255::(sacB-kan))
ANG235	TGCCGATTTAATATTGAGCATTGCGTAAAAAAAATATCACTGGATACATTATGGTACCCTCAACATTTTCTCGTTTG	[50 bp upstream of lpoA]-[lpoA start fwd]	lpoA(Δ58-252)
ANG239	GATTTTGTTGGTCGAGGCTGGGCTTTGCTGCATCTGCTGAAG	[reverse complement of ANG241]-[lpoA(1-57) rev]	lpoA(Δ58-252)
ANG241	CCAGCCTCGACCAACAAAATC	[lpoA(253-679) fwd]	lpoA(Δ58-252)
ANG242	CAGCCAGCGACGCGCTTGTGCTTCCCACGCATCGCCGGTCTGTTTGGTGGTTAACTGACGGGGACTACCTGAC	[reverse complement of 50 bp downstream of lpoA]-[lpoA stop rev]	lpoA(Δ58-252)
ANG478	GACGAGGTCGTCGCGATCTCAAGTCCGAAATCAACATTGTACCGTTGCTGGCCCGTAGTCTGCAAATCC	[50 bp upstream of tolR(23)]-[pDS132 sacB-cat cassette fwd]	tolQ(D23R)
ANG479	GTGATGATGGGCGCTGTCGCCATAAAGATCAGCAACAGCACCAGCAGTACCCATGACCCGGGAATTACG	[50 bp downstream of tolR(23)]-[pDS132 sacB-cat cassette rev]	tolQ(D23R)
ANG484	GTCGCCATAAAGATCAGCAACAGCACCAGCAGTACACGCAGCAACGGTACAATGTTGATTTCGGACTTGAGAT	tolR D23R mutagenesis primer	tolQ(D23R)
ANG143	CTGGTACTGATGGCGCTAAACAGGCACAAAAACGTCTGAACGCGATGTAATCCTTTTATGATTTTCTATCAAACAAAAGAGG	[last 50 bp of cpoB]-[pDS132 sacB-cat cassette fwd]	cpoB-mCherry
ANG144	TTCGCACGACACGACCAGAAATAATGCGACTTCTGGTCGTGTGTTATGCAGCTTGGTCGGTCATTTCGAACC	[reverse complement of 50 bp downstream of cpoB]-[pDS132 sacB-cat cassette rev]	cpoB-mCherry
ANG177	ACCCTGGTACTGATGGCGCTAAACAGGCACAAAAACGTCTGAACGCGATGGGCAGCGGTTCTGGCTCCGGTAGCGTGAGCAAGGGCGAGGAGG	[last 50 bp of cpoB (no stop codon)]-[GSGSGSGS linker]-[mCherry fwd]	cpoB-mCherry
ANG178	TTCGCACGACACGACCAGAAATAATGCGACTTCTGGTCGTGTGTTATGCATTACTTGTACAGCTCGTCCATG	[reverse complement of 50 bp downstream of cpoB]-[mCherry rev]	cpoB-mCherry
ANG263	CTTGCTTGAAAGAGAGCGGGTAACAGGCGAACAGTTTTTGGAAACCGAGAGCCCGTAGTCTGCAAATCC	[50 bp upstream tolA]-[pDS132 sacB-cat cassette fwd]	gfpmut2-tolA
ANG264	ATAATTATCGCCCGCTTGAGCTTGTCGTTTTGTTCGGTTGCCTTTGACACCCATGACCCGGGAATTACG	[reverse complement of first 50 bp of tolA]-[pDS132 sacB-cat cassette rev]	gfpmut2-tolA
ANG347	CTTGCTTGAAAGAGAGCGGGTAACAGGCGAACAGTTTTTGGAAACCGAGAATGTCGAAAGGAGAAGAACTTTTCAC	[50 bp upstream tolA]-[gfpmut2 fwd]	gfpmut2-tolA
ANG349	ATAATTATCGCCCGCTTGAGCTTGTCGTTTTGTTCGGTTGCCTTTGACACTCCGCCAAAACAGCCAAG	[reverse complement of first 50 bp of tolA]-[ATGTRT linker+gfpmut2 rev]	gfpmut2-tolA
primers for plasmid construction
ANG005	ATAATAGAGCTCGGTACTGGTTTACTAAGAGAATTGC	[ATAATA]-[SacI]-[25 bp upstream cpoB fwd], for pBAD33-cpoB cloning	pBAD33-CpoB
ANG006	ATAATAGCATGCATTACATCGCGTTCAGAC	[ATAATA]-[SphI]-[cpoB rev], for pBAD33-cpoB clonign	pBAD33-CpoB
ANG093	ATAATAGAGCTCGAATATTGCGGAGAAAAAGCATG	[ATAATA]-[SacI]-[20 bp upstream mrcB fwd], for pBAD33-PBP1B cloning	pBAD33-PBP1B
ANG094	ATAATATCTAGATAGATGTTAATTACTACCAAACATATCCTTG	[ATAATA]-[XbaI]-[stop mrcB rev], for pBAD33-PBP1B cloning	pBAD33-PBP1B
ANG147	ATAATAGAGCTCACAGTTTTTGGAAACCGAGAGTG	[ATAATA]-[SacI]-[20 bp upstream tolA fwd], for pBAD33-TolA (pTolA) cloning	pTolA
ANG148	ATAATATCTAGATTACGGTTTGAAGTCCAATGGC	[ATAATA]-[XbaI]-[stop tolA rev], for pBAD33-tolA (pTolA) cloning	pTolA
ANG182	ATAATACATATGGCTCAGGCACCAATCAGTAG	[ATAATA]-[NdeI]-[start cpoB fwd], for pET28a-His6-CpoB cloning	pET28-His6-CpoB
ANG184	ATAATAGAGCTCTTACATCGCGTTCAGACGTTTTTGTG	[ATAATA]-[SacI]-[stop cpoB rev], for pET28a-His6-CpoB cloning	pET28-His6-CpoB
ANG319	ATAATACATATGTCAAAGGCAACCGAAC	[ATAATA]-[NdeI]-[tolA start fwd] (substitutes NdeI ATG for tolA GTG start)	pET28-His6-TolA
ANG320	ATAATAGAGCTCTTACGGTTTGAAGTCCAATGG	[ATAATA]-[SacI]-[tolA stop rev]	pET28-His6-TolA
ANG185	ATAATACATATGGCGAAGCGTTCTGATGAACAG	[ATAATA]-[NdeI]-[tolA nt 220 (aa 74) fwd], for pET28a-His6-TolA cloning	pET28-His6-TolA(sol)
ANG187	ATAATAGAGCTCTTACGGTTTGAAGTCCAATGGC	[ATAATA]-[SacI]-[stop tolA rev], for pET28a-His6-TolA cloning	pET28-His6-TolA(sol)
ANG317	ATAATAGGTCTCTCATGTCAAAGGCAACCGAAC	[ATAATA]-[BsaI for ligation into NcoI]-[tolA start fwd] (substitutes NcoI ATG for tolA GTG)	pET28-TolA-His6
ANG318	ATAATACTCGAGCGGTTTGAAGTCCAATGG	[ATAATA]-[XhoI]-[tolA end rev (no stop codon)]	pET28-TolA-His6
primers for site-directed mutagenesis (QuickChange)
T118_TAG_fwd	CTTGAGCCAGACATGTAGATCAGCAAGAACG	fwd primer for introducing amber codon at T118 in PBP1B	pDML924-T118amber
T118_TAG_rev	CGTTCTTGCTGATCTACATGTCTGGCTCAAG	rev primer for introducing amber codon at T118 in PBP1B	pDML924-T118amber
E123_TAG_fwd	GCAAGAACTAGATGGTGAAGC	fwd primer for introducing amber codon at E123 in PBP1B	pDML924-E123amber
E123_TAG_rev	GCTTCACCATCTAGTTCTTGC	rev primer for introducing amber codon at E123 in PBP1B	pDML924-E123amber
T751_TAG_fwd	GGCTAACCAGTAGCCAACGCCGC	fwd primer for introducing amber codon at T751 in PBP1B	pDML924-T751amber
T751_TAG_rev	GCGGCGTTGGCTACTGGTTAGCC	rev primer for introducing amber codon at T751 in PBP1B	pDML924-T751amber
T753_TAG_fwd	GGCTAACCAGACGCCATAGCCGC	fwd primer for introducing amber codon at T753 in PBP1B	pDML924-T753amber
T753_TAG_rev	GCGGCTATGGCGTCTGGTTAGCC	rev primer for introducing amber codon at T753 in PBP1B	pDML924-T753amber
255
679
