# Supplementary figures and images for: Coordination of peptidoglycan synthesis and outer membrane constriction during Escherichia coli cell division
Source: eLife journal article supplement (doi:10.7554/elife.07118), 2015-05-07

**Figure 4—figure supplement 2. CpoB localizes to mid-cell.**

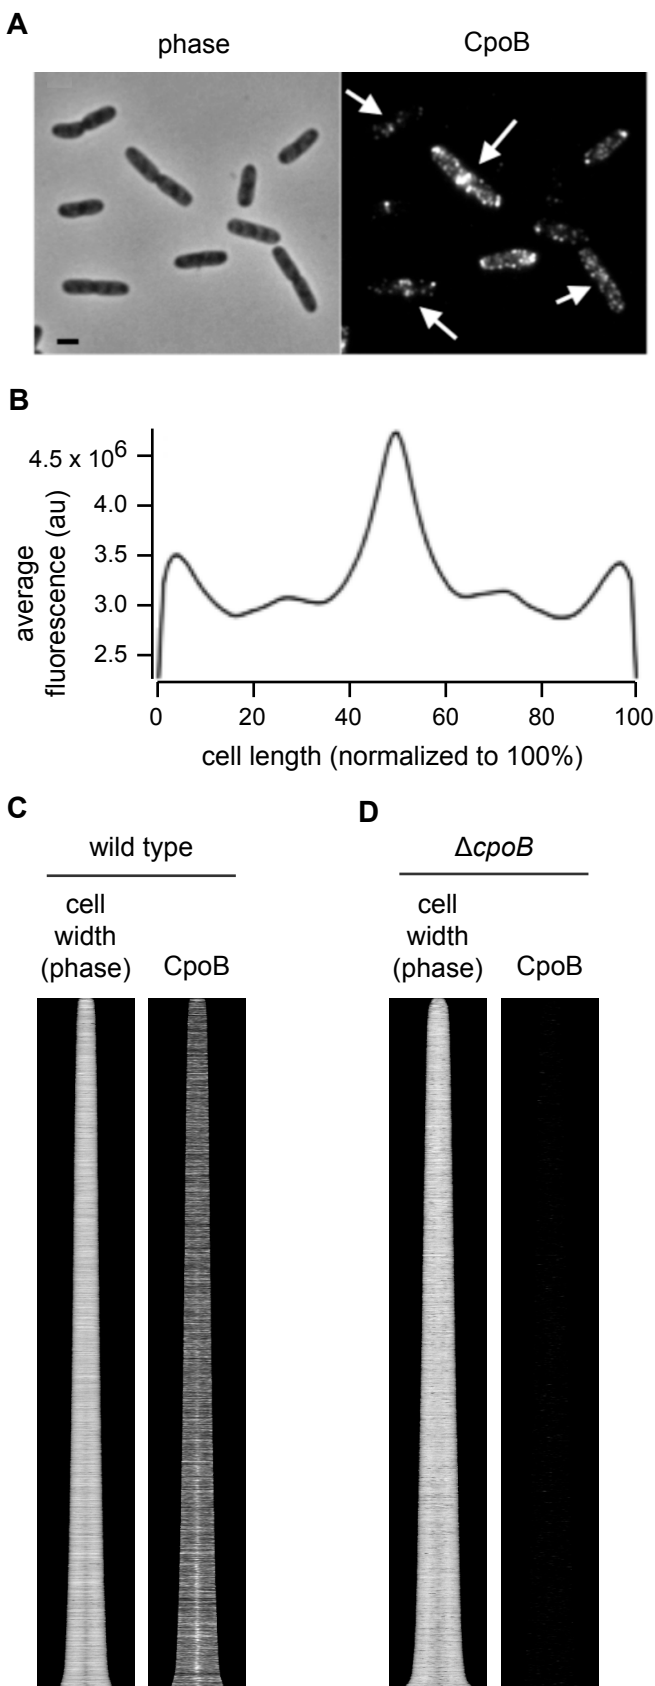

Supplement: supp [file elife-07118-supp-v1.zip]

**Figure 6—figure supplement 6. PBP1B GTase and TPase activity assays.**

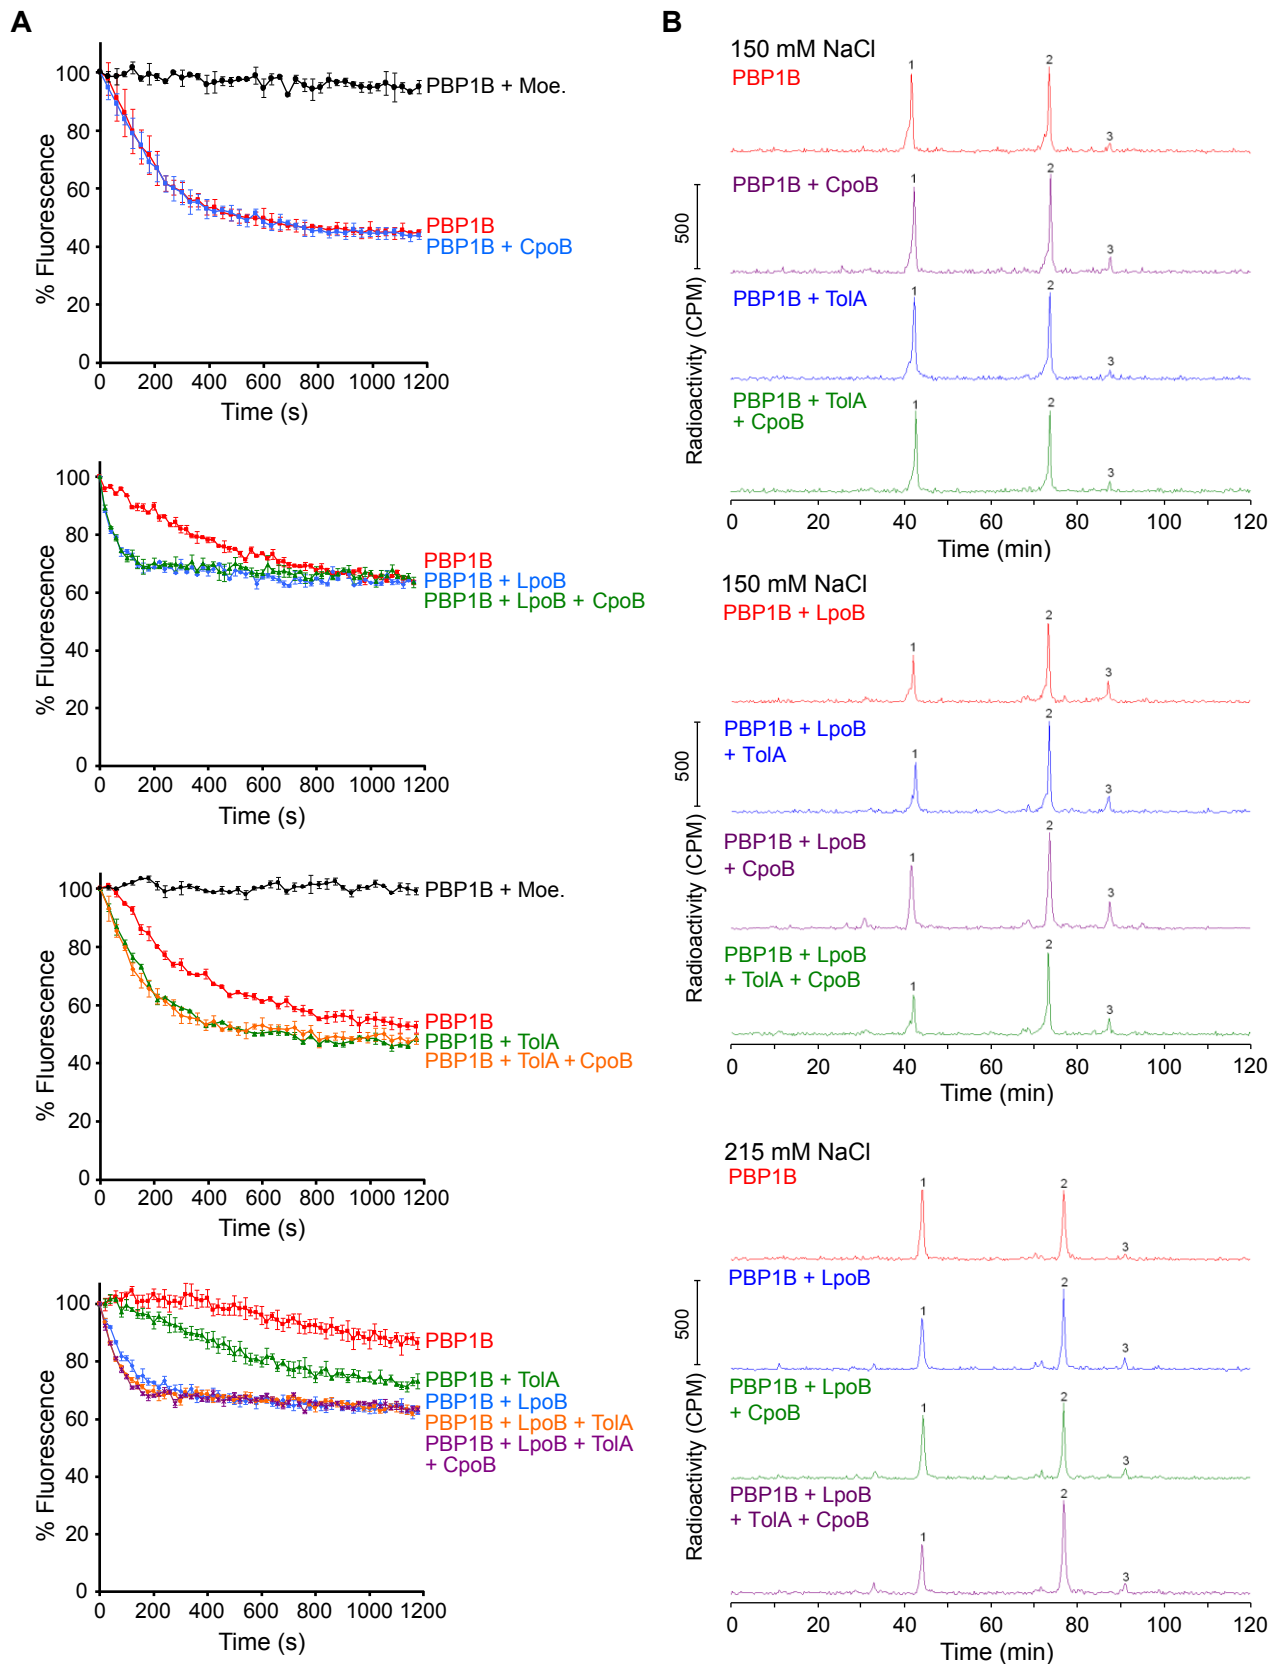

Supplement: supp [file elife-07118-supp-v1.zip]

**Figure 4—figure supplement 5. Localization of CpoB to mid-cell is independent of PBP1B and TolA.**

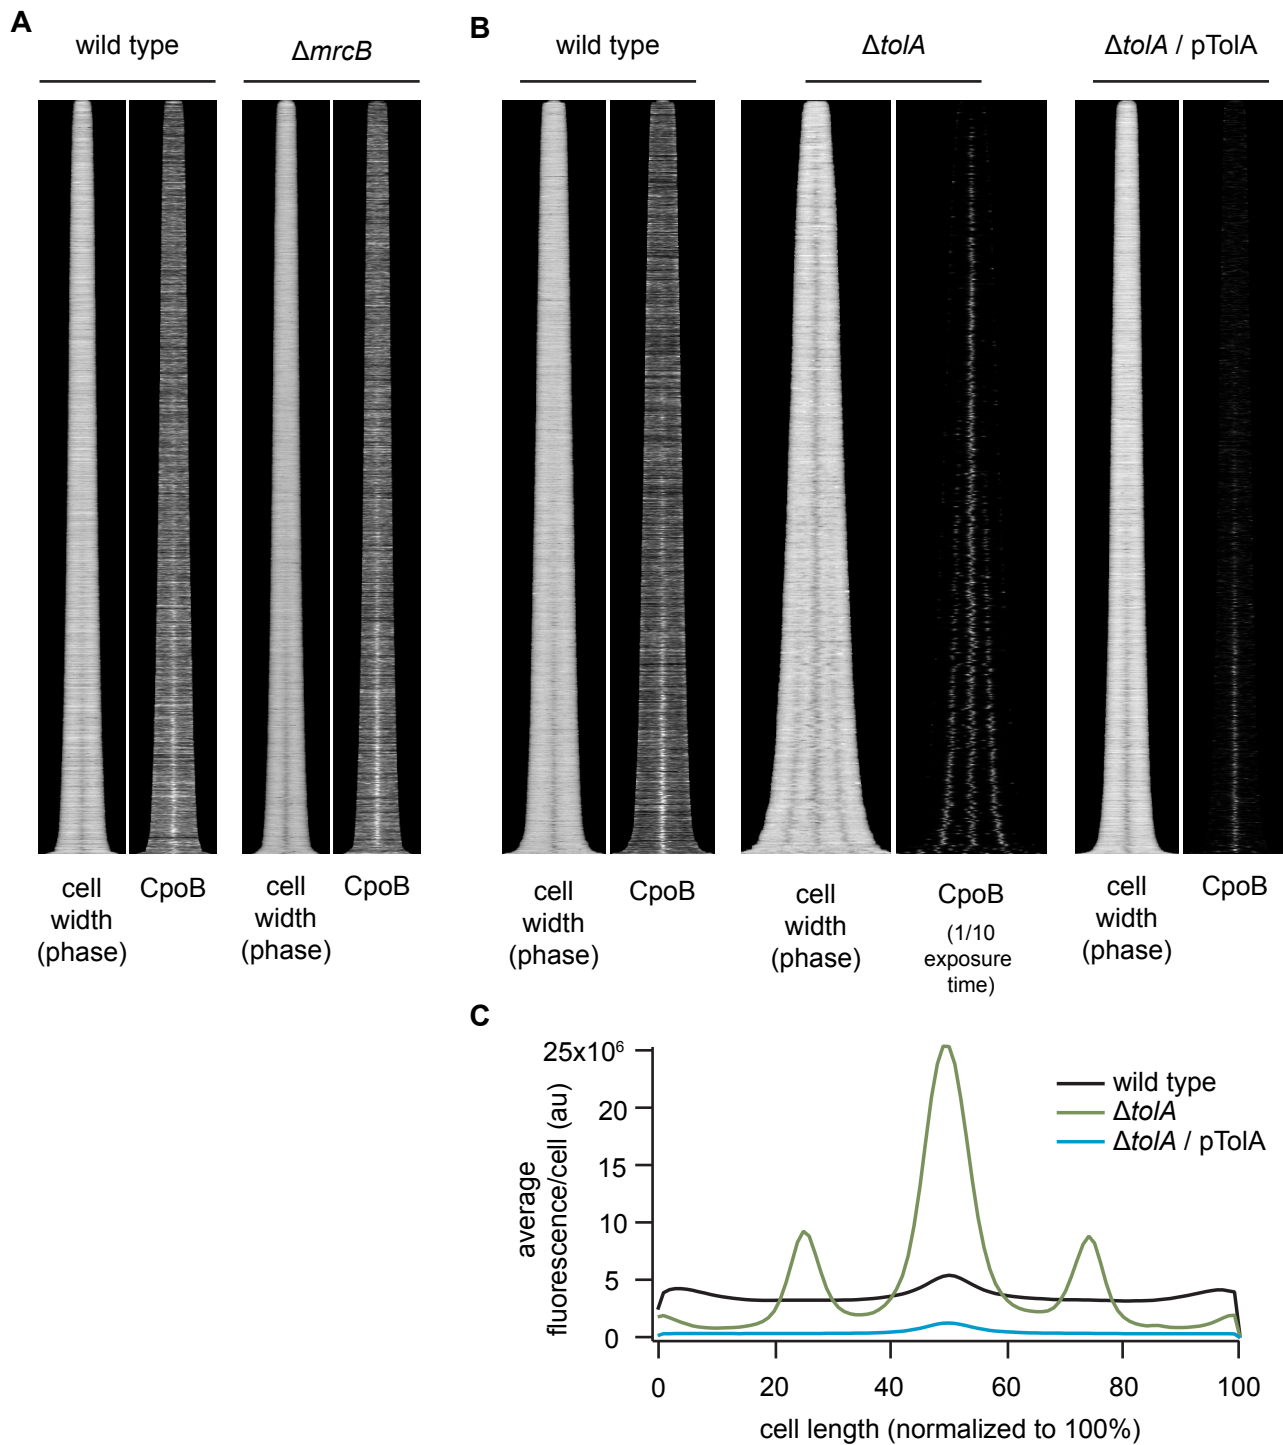

Supplement: supp [file elife-07118-supp-v1.zip]

**Figure 5–figure supplement 1. Demonstration of ternary complexes *in vitro*.**

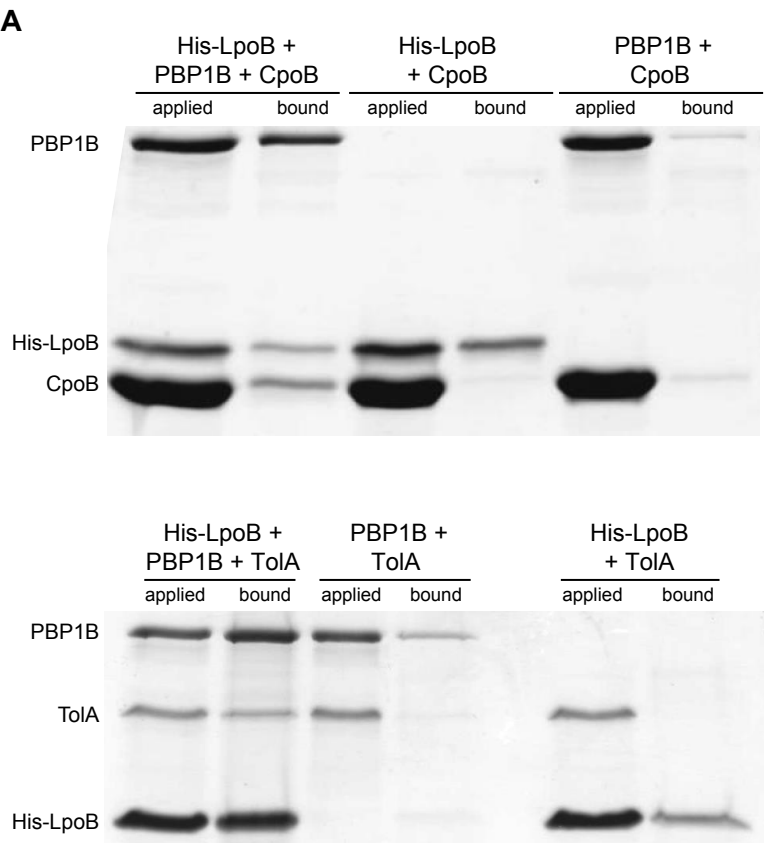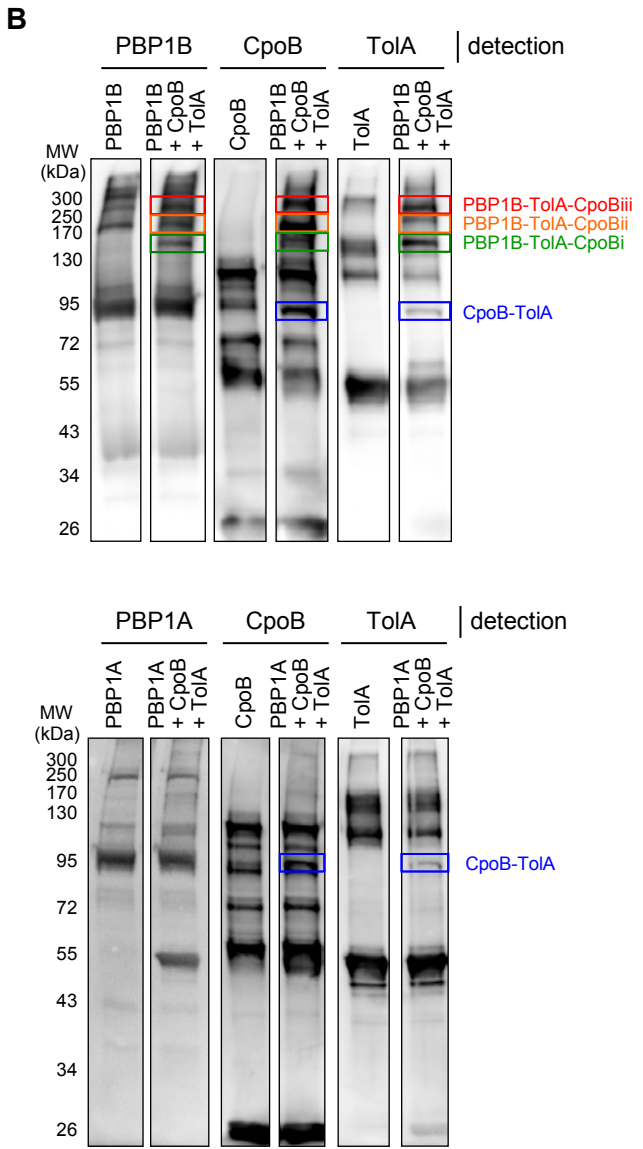

Supplement: supp [file elife-07118-supp-v1.zip]
